# Supplementary material for: A sustainable CVD approach for ZrN as a potential catalyst for nitrogen reduction reaction
Source: Royal Society of Chemistry journal article supplement (doi:10.1039/d4dt01252f), 2024-01-01
Supplement: d4dt01252f1.zip [file d4dt01252f1.zip]

#### Supporting Information

**A sustainable CVD approach for ZrN as potential catalyst for nitrogen reduction reaction.**

*Jean-Pierre Glauber*a, *Julian Lorenzb*, *Ji Liu*c, *Björn Müller*d, *Sebastian Bragulla*be, *Aleksander Kostka*f, *Detlef Rogalla*g, *Michael Wark*d, *Michael Nolan*c, *Corinna Harms*b, *Anjana Devi**ahi

aInorganic Materials Chemistry, Ruhr University Bochum, Universitätsstraße 150, 44801 Bochum, Germany

bInstitute of Engineering Thermodynamics, German Aerospace Center (DLR), Carl-von-Ossietzky-Str. 15, 26129 Oldenburg, Germany

cTyndall National Institute, University College Cork, Lee Maltings, Dyke Parade, T12 R5CP Cork, Ireland

dInstitute of Chemistry, Carl von Ossietzky University Oldenburg, Carl-von-Ossietzky-Str. 9-11, 26129 Oldenburg, Germany

eInstitute of Building Energetics, Thermal Engineering and Energy Storage, University of Stuttgart, Pfaffenwaldring 31, 70569 Stuttgart, Germany

fCenter for Interface Dominated Materials (ZGH), Ruhr University Bochum, 44801 Bochum,

Germany

gRUBION, Ruhr University Bochum, Universitätsstr. 150, 44801 Bochum, Germany

hLeibniz Institute for Solid State and Materials Research, Helmholtzstr. 20, 01069, Dresden, Germany

iChair of Materials Chemistry, Bergstr. 66, 01069, Dresden, Germany

**Table of Contents**

[1. Precursor Characterization 3](#_Toc163162459)

[1.1. Electron Impact Mass spectrometry (EI-MS) 3](#_Toc163162460)

[2. Thin film analysis 4](#_Toc163162461)

[2.1. Raman spectroscopy 4](#_Toc163162462)

[3. *Ab initio* molecular dynamics (aiMD) 4](#_Toc163162463)

[4. References 5](#_Toc163162464)

# Precursor Characterization

## Electron Impact Mass spectrometry (EI-MS)


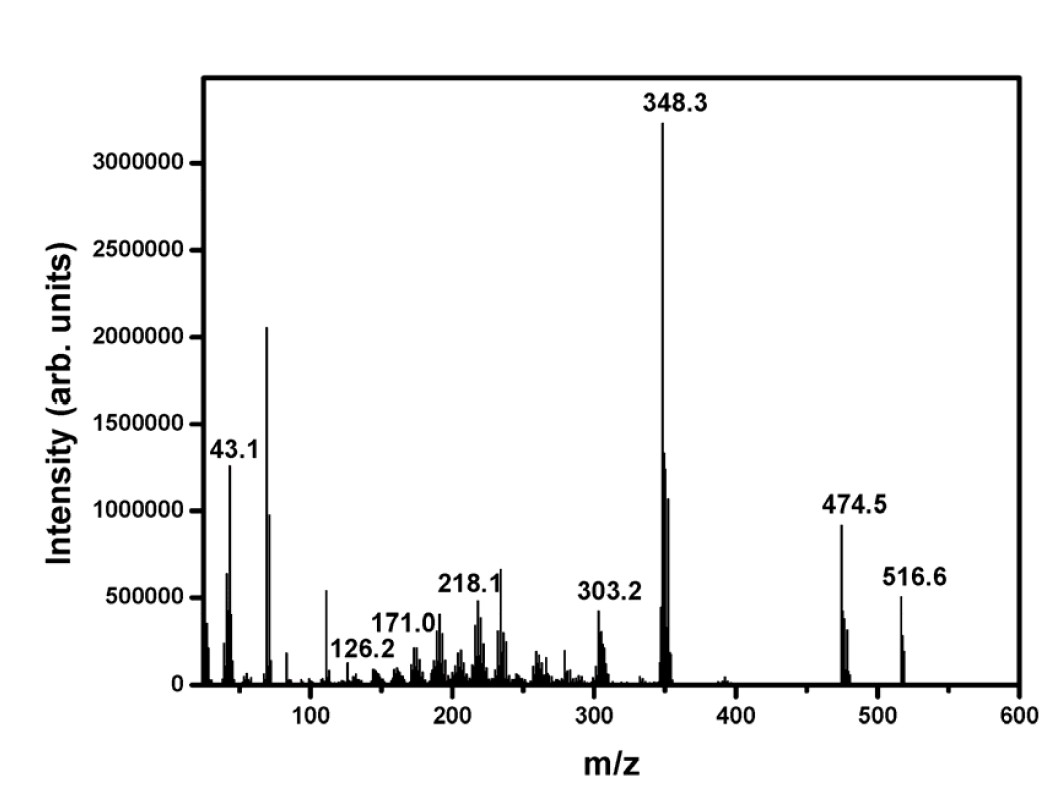


**Figure S1**. Mass spectrum of [Zr{η2 (*i*PrN)2CNMe2}2(NMe2)2] (**1**). (EI-MS, 70 eV).1

**Table S1**. Proposed EI-MS fragmentation pattern of compound (**1**).

| Fragments* | Mass (m/z) | Rel. intensity |
| --- | --- | --- |
| M+ | 516.6 | 19 |
| M+-NMe2 | 474.5 | 28 |
| M+-NMe2-CDI | 348.3 | 100 |
| M+-NMe2-L | 303.2 | 14 |
| M+-L-CDI | 218.1 | 15 |
| L+ | 171.0 | 4 |
| CDI | 126.2 | 4 |
| NMe2/*i*Pr | 43.1 | 39 |

*M+ molecular ion; L: {*i*PrN)2CNMe2}; CDI: *N*,*N*´-diisopropylcarbodiimide.

# Thin film analysis

## Raman spectroscopy


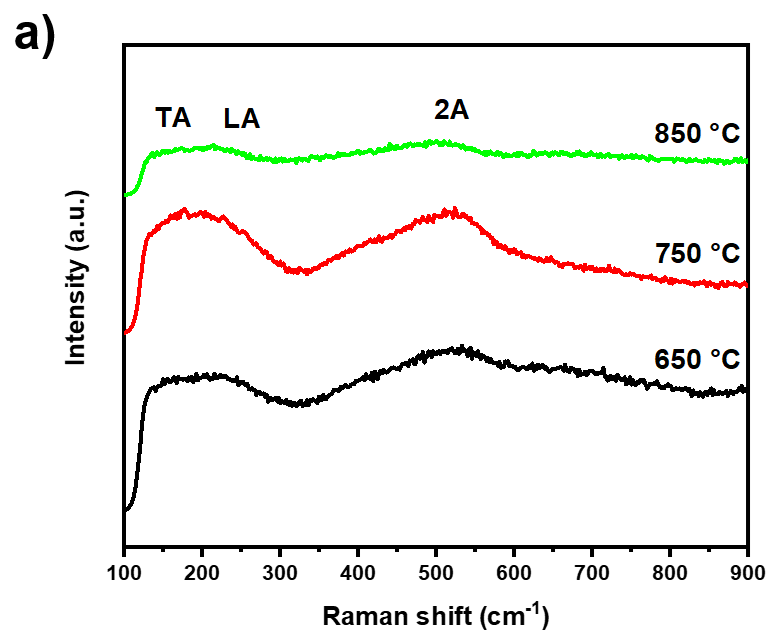


**Figure S2**. Raman spectra of ZrN thin films deposited on GC substrates as a function of deposition temperature. The Raman peaks are assigned according to literature reports.2–4

# *Ab initio* molecular dynamics (aiMD)

References

1 M. Banerjee, N. B. Srinivasan, H. Zhu, S. J. Kim, K. Xu, M. Winter, H.-W. Becker, D. Rogalla, T. de los Arcos, D. Bekermann, D. Barreca, R. A. Fischer and A. Devi, *Cryst. Growth Des.*, 2012, **12**, 5079–5089.

2 Q. Chen, S. Yang, C. Li, W. Yao, X. Liu, H. Niu, R. Yang, H. Li, H. Wei, L. Wang and Z. Wang, *J. Phys. D: Appl. Phys.*, 2022, **55**, 404003.

3 C. Moura, P. Carvalho, F. Vaz, L. Cunha and E. Alves, *Thin Solid Films*, 2006, **515**, 1132–1137.

4 A. Singh, P. Kuppusami, S. Khan, C. Sudha, R. Thirumurugesan, R. Ramaseshan, R. Divakar, E. Mohandas and S. Dash, *Appl. Surf. Sci.*, 2013, **280**, 117–123.
